# Supplementary material for: miRNA142-3p targets Tet2 and impairs Treg differentiation and stability in models of type 1 diabetes
Source: Springer Nature journal article supplement (doi:10.1038/s41467-019-13587-3), 2019-12-13
Supplement: MOESM1 [file 41467_2019_13587_MOESM1_ESM.pdf › 41467_2019_13587_MOESM1_ESM.pdf]

Supplementary Information for:

miRNA142-3p targets Tet2 and impairs Treg  
differentiation and stability in models of type 1 diabetes

Scherm et al.

This PDF file includes: Supplementary Figures 1-17, Table S1

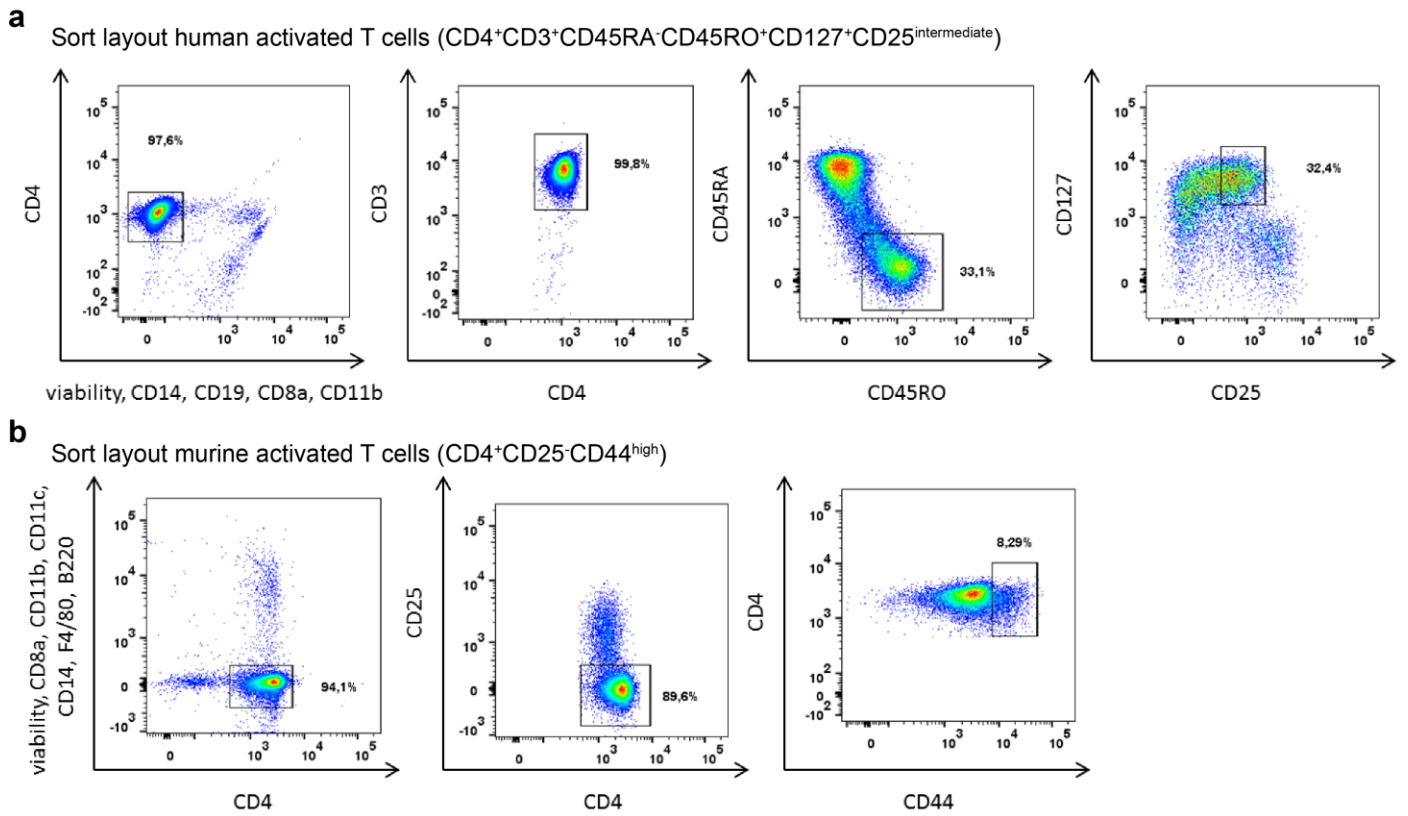

**Supplementary Figure 1. Gating strategy for FACS sorting of human and murine activated T cells. (a)** Representative FACS plot for the sorting of human activated T cells:  $CD4^+CD3^+CD45RA^-CD45RO^+CD127^+CD25^{intermediate}$ . **(b)** Representative FACS plot for the sorting of murine activated T cells:  $CD4^+CD25^-CD44^{high}$ .

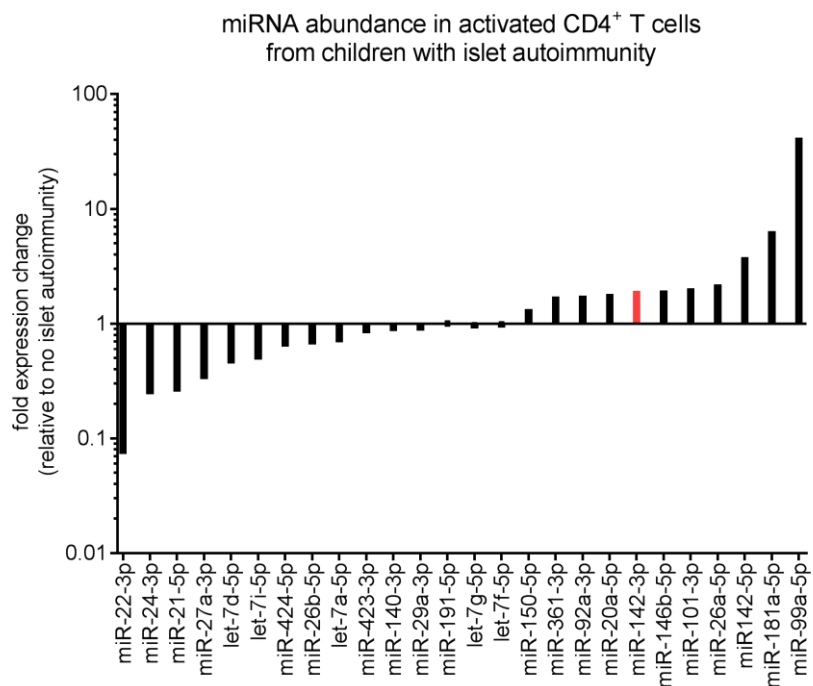

**Supplementary Figure 2. Changed miRNA abundance in activated CD4<sup>+</sup> T cells from children with ongoing islet autoimmunity.** Fold expression change of miRNAs in activated CD4<sup>+</sup> T cells from children with ongoing islet autoimmunity compared to healthy controls.

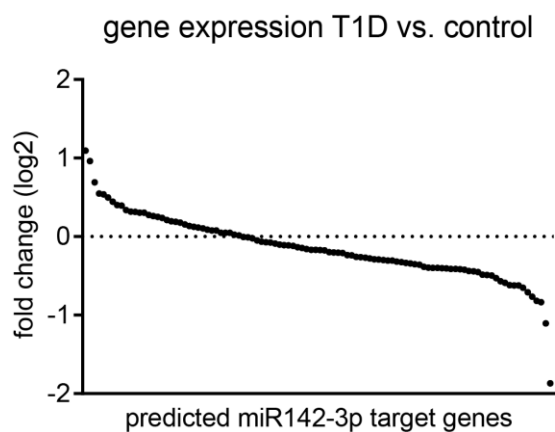

**Supplementary Figure 3. Predicted miR142-3p targets are downregulated in CD4<sup>+</sup> T cells from individuals with ongoing islet autoimmunity.** Fold expression change of 104 predicted miR142-3p target genes in CD4<sup>+</sup> T cells from individuals with ongoing islet autoimmunity compared to healthy controls. Source data are provided as a Source Data file.

**a** Sort layout murine naive T cells ( $CD4^+CD25^-CD44^-$ )

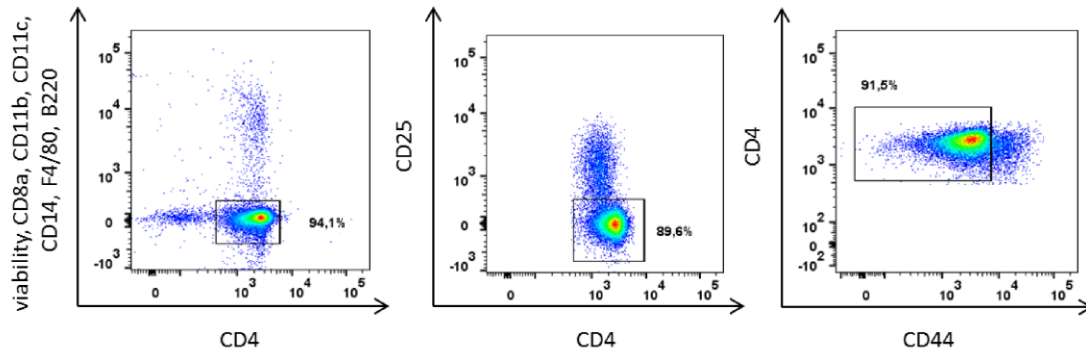

**b** Sort layout human naive T cells ( $CD4^+CD3^+CD45RA^+CD45RO^-CD127^+CD25^-$ )

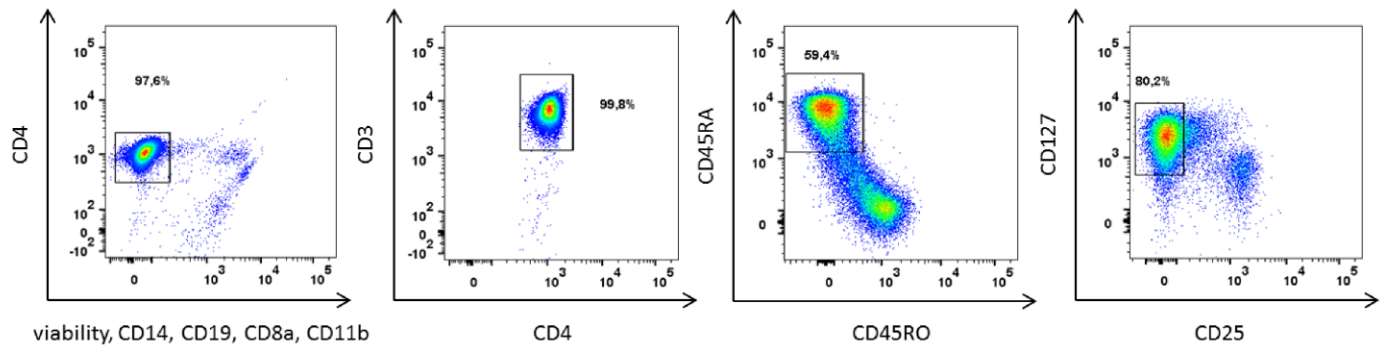

**Supplementary Figure 4. Gating strategy for FACS sorting of murine and human naive T cells. (a)** Representative FACS plot for the sorting of murine naive T cells:  $CD4^+CD25^-CD44^-$ . **(b)** Representative FACS plot for the sorting of human naive T cells:  $CD4^+CD3^+CD45RA^+CD45RO^-CD127^+CD25^-$ .

**a** Gating strategy murine Tregs (CD4<sup>+</sup>CD25<sup>+</sup>Foxp3<sup>+</sup>)

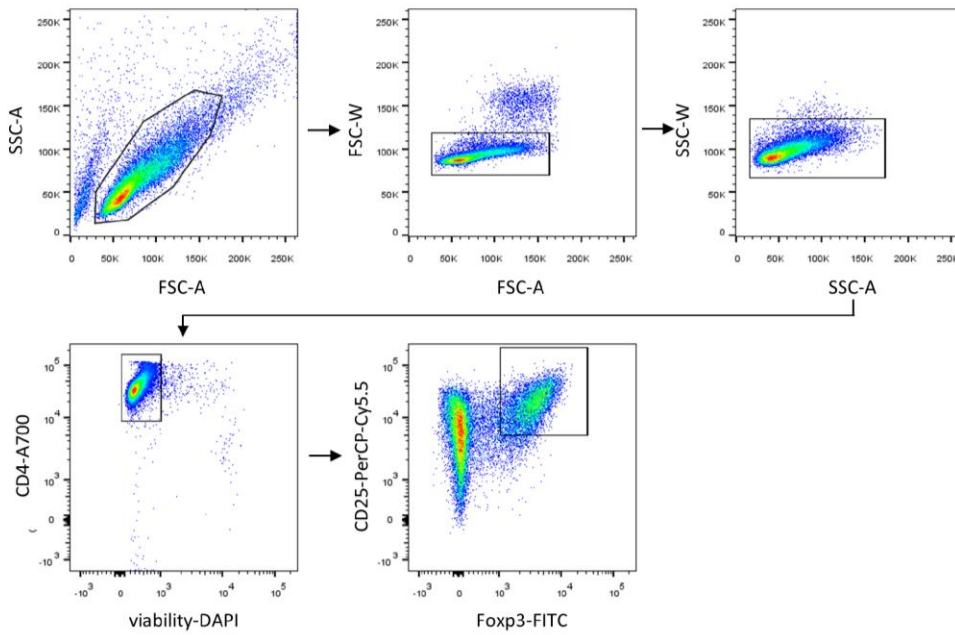

**b** Gating strategy human Tregs (CD4<sup>+</sup>CD3<sup>+</sup>CD127<sup>-</sup>CD25<sup>+</sup>Foxp3<sup>+</sup>)

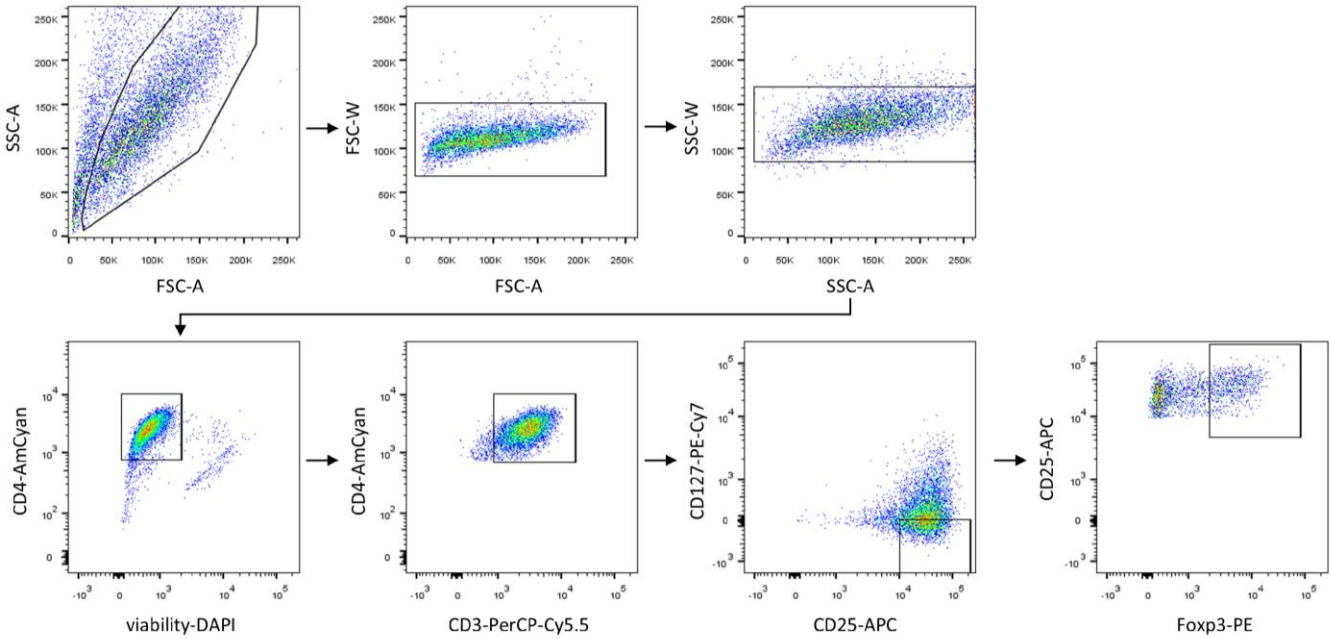

**Supplementary Figure 5. Gating strategy for FACS sorting of induced murine and human Treg. (a)** Representative FACS plot for the sorting of induced murine Tregs: CD4<sup>+</sup>CD25<sup>+</sup>Foxp3<sup>+</sup>. These gating panels correspond to Figures 2a, c-f and 5i. **(b)** Representative FACS plot for the sorting of induced human Tregs: CD4<sup>+</sup>CD3<sup>+</sup>CD127<sup>-</sup>CD25<sup>+</sup>Foxp3<sup>+</sup>. These gating panels correspond to Figures 3a, c-e and 5j.

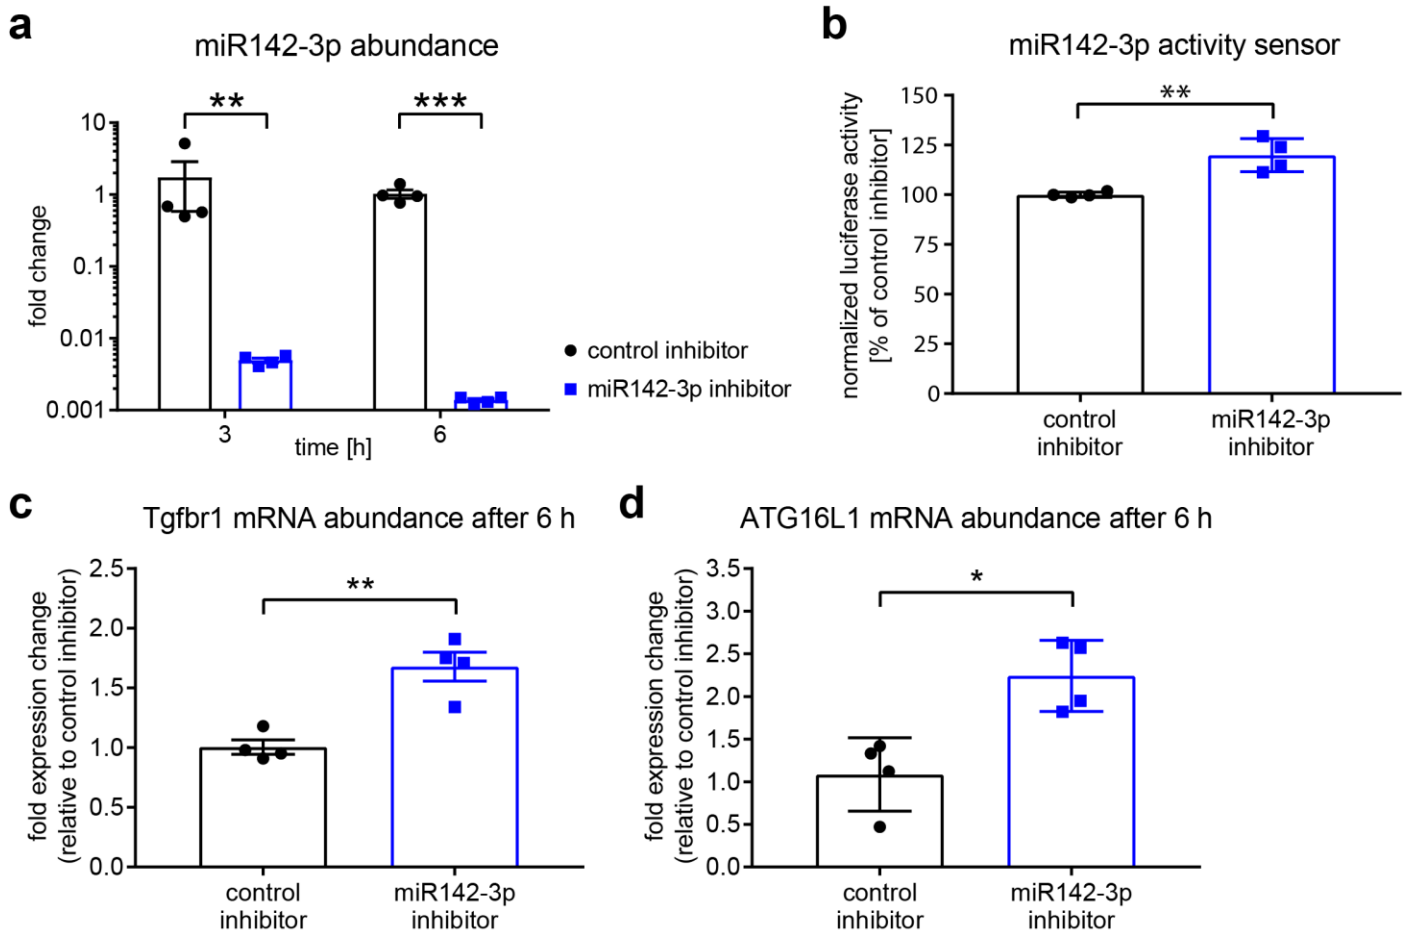

**Supplementary Figure 6. miR142-3p inhibitor efficiently blocks its target miRNA.** (a) Effect of the miR142-3p inhibitor on levels of miR142-3p upon TCR stimulation of naive CD4<sup>+</sup> T cells isolated from lymph nodes of BALB/c mice as revealed by qPCR normalized to 5s rRNA. *n* = 4. (b) Normalized luciferase activity of Jurkat T cells co-transfected with a miR142-3p inhibitor and a miR142-3p activity sensor plasmid containing the miR142-3p target sequences in the 3'-UTR. *n* = 4. (c) Levels of Tgfb1 mRNA, an established target of miR142-3p, after 6 hours of TCR stimulation of CD4<sup>+</sup> T cells isolated from lymph nodes of BALB/c mice, in presence of a miR142-3p inhibitor and a control inhibitor respectively as revealed by qPCR normalized to Histone mRNA. *n* = 4. (d) Levels of ATG16L1 mRNA, an established target of miR142-3p, after 6 hours of TCR stimulation of CD4<sup>+</sup> T cells isolated from lymph nodes of BALB/c mice, in presence of a miR142-3p inhibitor and a control inhibitor respectively as revealed by qPCR normalized to Histone mRNA. *n* = 4. One data point represents one subject. Experiments were performed in three technical replicates per subject. Data are presented as box-and-whisker plots with min and max values or as means  $\pm$  SEM. (a) Ordinary one-way ANOVA, Tukey's multiple comparisons test. (b, c and d) Student's t-test. \**P* < 0.05, \*\**P* < 0.01, \*\*\**P* < 0.001. Source data are provided as a Source Data file.

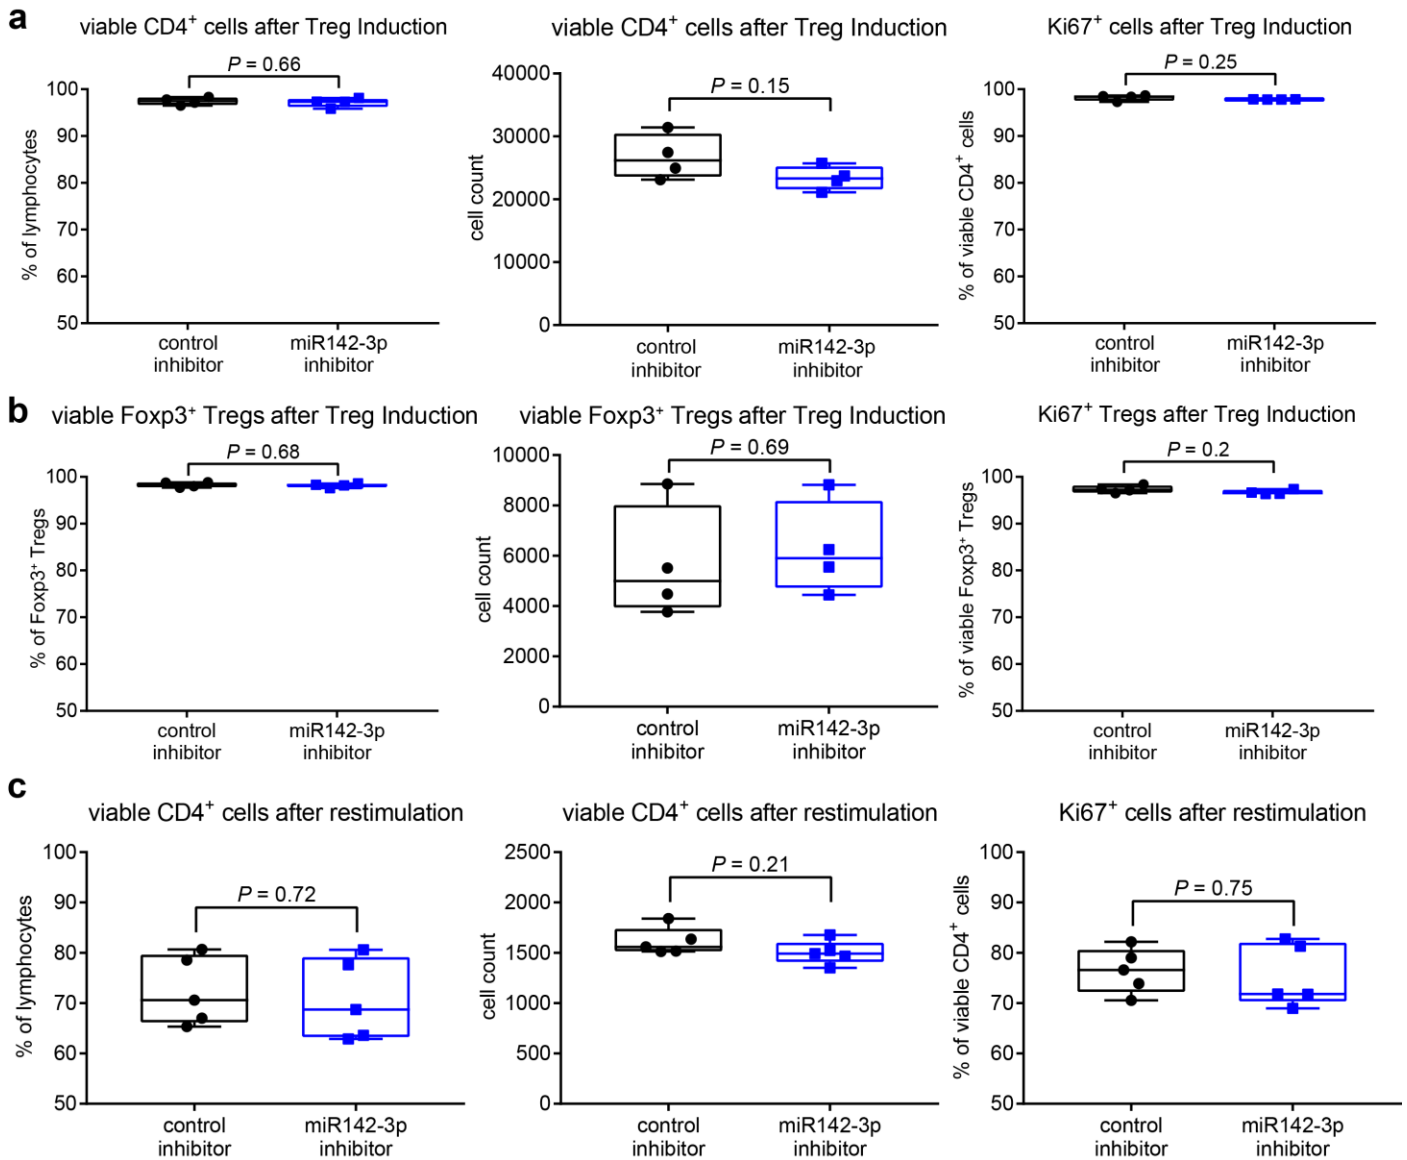

**Supplementary Figure 7. miR142-3p inhibition does not affect cell viability or proliferation during Treg induction or restimulation *in vitro*.** (a) Cell viability (% and cell count) and Ki67<sup>+</sup> cells of CD4<sup>+</sup> T cells after Treg induction using subimmunogenic stimulation of naive CD4<sup>+</sup> T cells isolated from lymph nodes of BALB/c mice as revealed by flow cytometry.  $n = 4$ . (b) Cell viability (% and cell count) and Ki67<sup>+</sup> cells of Foxp3<sup>+</sup> Tregs after induction *in vitro* using subimmunogenic stimulation of naive CD4<sup>+</sup> T cells isolated from lymph nodes of BALB/c mice as revealed by flow cytometry.  $n = 4$ . (c) Cell viability (% and cell count) and Ki67<sup>+</sup> cells of CD4<sup>+</sup> T cells after restimulation of *in vitro* induced Tregs for 30 hours as revealed by flow cytometry.  $n = 5$ . One data point represents one subject. Experiments were performed in three technical replicates per subject. Data are presented as box-and-whisker plots with min and max values. Student's t-test. Source data are provided as a Source Data file.



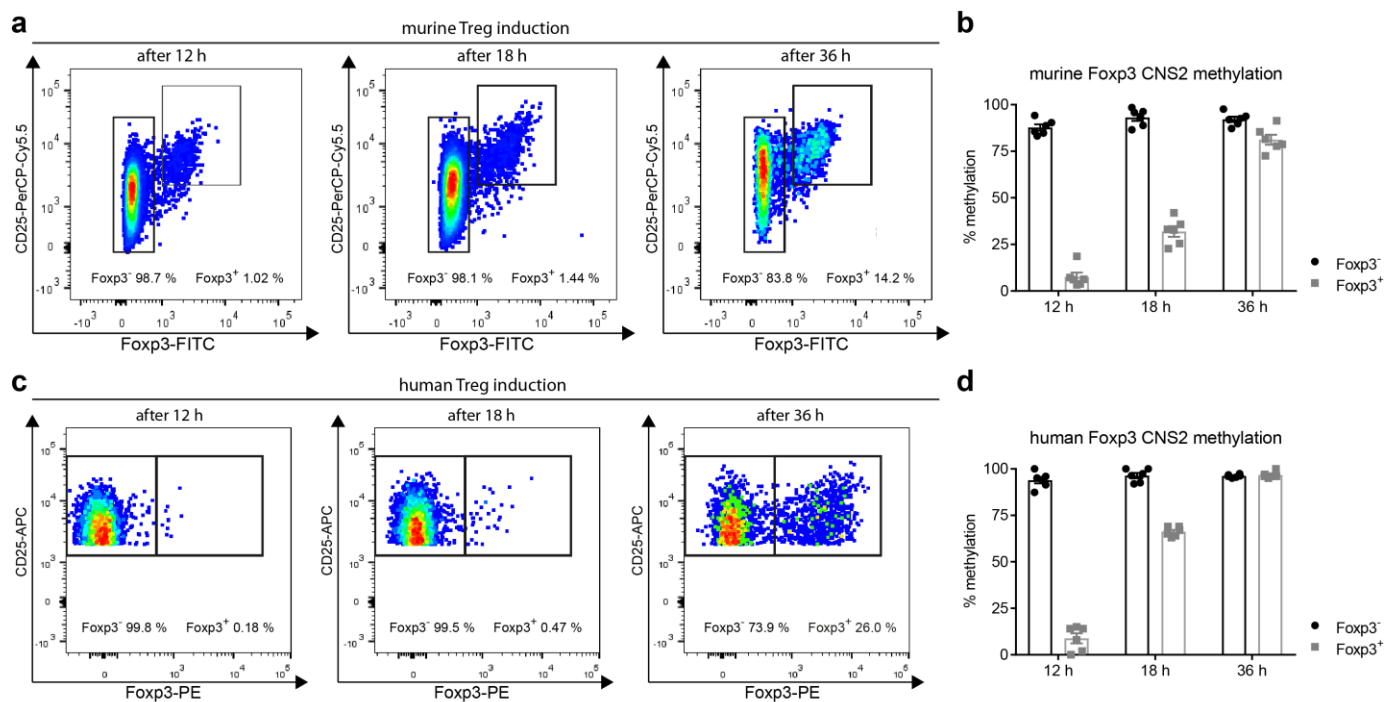

**Supplementary Figure 8. Early T cell activation induces rapid demethylation of the Foxp3 CNS2 only in Foxp3<sup>+</sup> cells.** (a) Representative flow cytometry plot indicating CD4<sup>+</sup>CD25<sup>+</sup>Foxp3<sup>+</sup> Tregs and CD4<sup>+</sup>Foxp3<sup>-</sup> T cells after 12, 18 and 36 hours of subimmunogenic stimulation of BALB/c naive CD4<sup>+</sup> T cells. (b) Methylation of four CpG sites in the murine Foxp3 CNS2 of CD4<sup>+</sup>CD25<sup>+</sup>Foxp3<sup>+</sup> Tregs and CD4<sup>+</sup>Foxp3<sup>-</sup> T cells after 12, 18 and 36 hours of subimmunogenic TCR stimulation as revealed by pyrosequencing. *n* = 6. (c) Representative flow cytometry plot indicating CD4<sup>+</sup>CD127<sup>-</sup>CD25<sup>+</sup>Foxp3<sup>+</sup> Tregs and CD4<sup>+</sup>CD127<sup>-</sup>CD25<sup>+</sup>Foxp3<sup>-</sup> T cells after 12, 18 and 36 hours of TCR stimulation of human naive CD4<sup>+</sup> T cells. (d) Methylation of eight CpG sites in the human Foxp3 CNS of CD4<sup>+</sup>CD127<sup>-</sup>CD25<sup>+</sup>Foxp3<sup>+</sup> Tregs and CD4<sup>+</sup>CD127<sup>-</sup>CD25<sup>+</sup>Foxp3<sup>-</sup> T cells after 12, 18 and 36 hours of subimmunogenic TCR stimulation as revealed by pyrosequencing. *n* = 6. Source data are provided as a Source Data file.

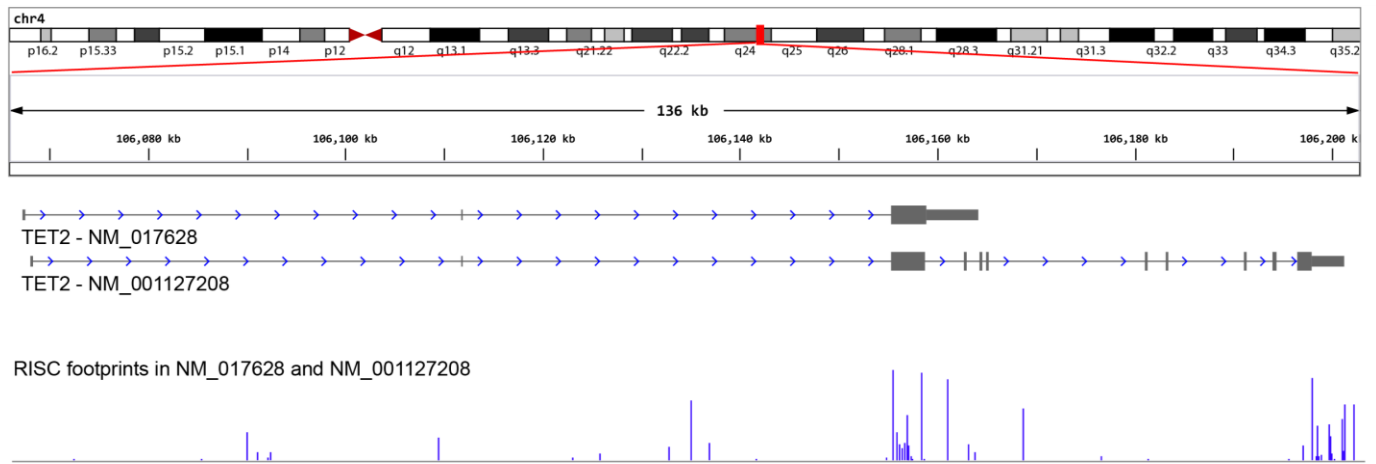

**Supplementary Figure 9. HITS-CLIP analysis of human CD4<sup>+</sup> T cells.** From top to bottom: Location of the human TET2 gene on chromosome 4. The human TET2 transcripts NM\_017628 and NM\_001127208 and RISC footprints (purple bars) on these transcripts.

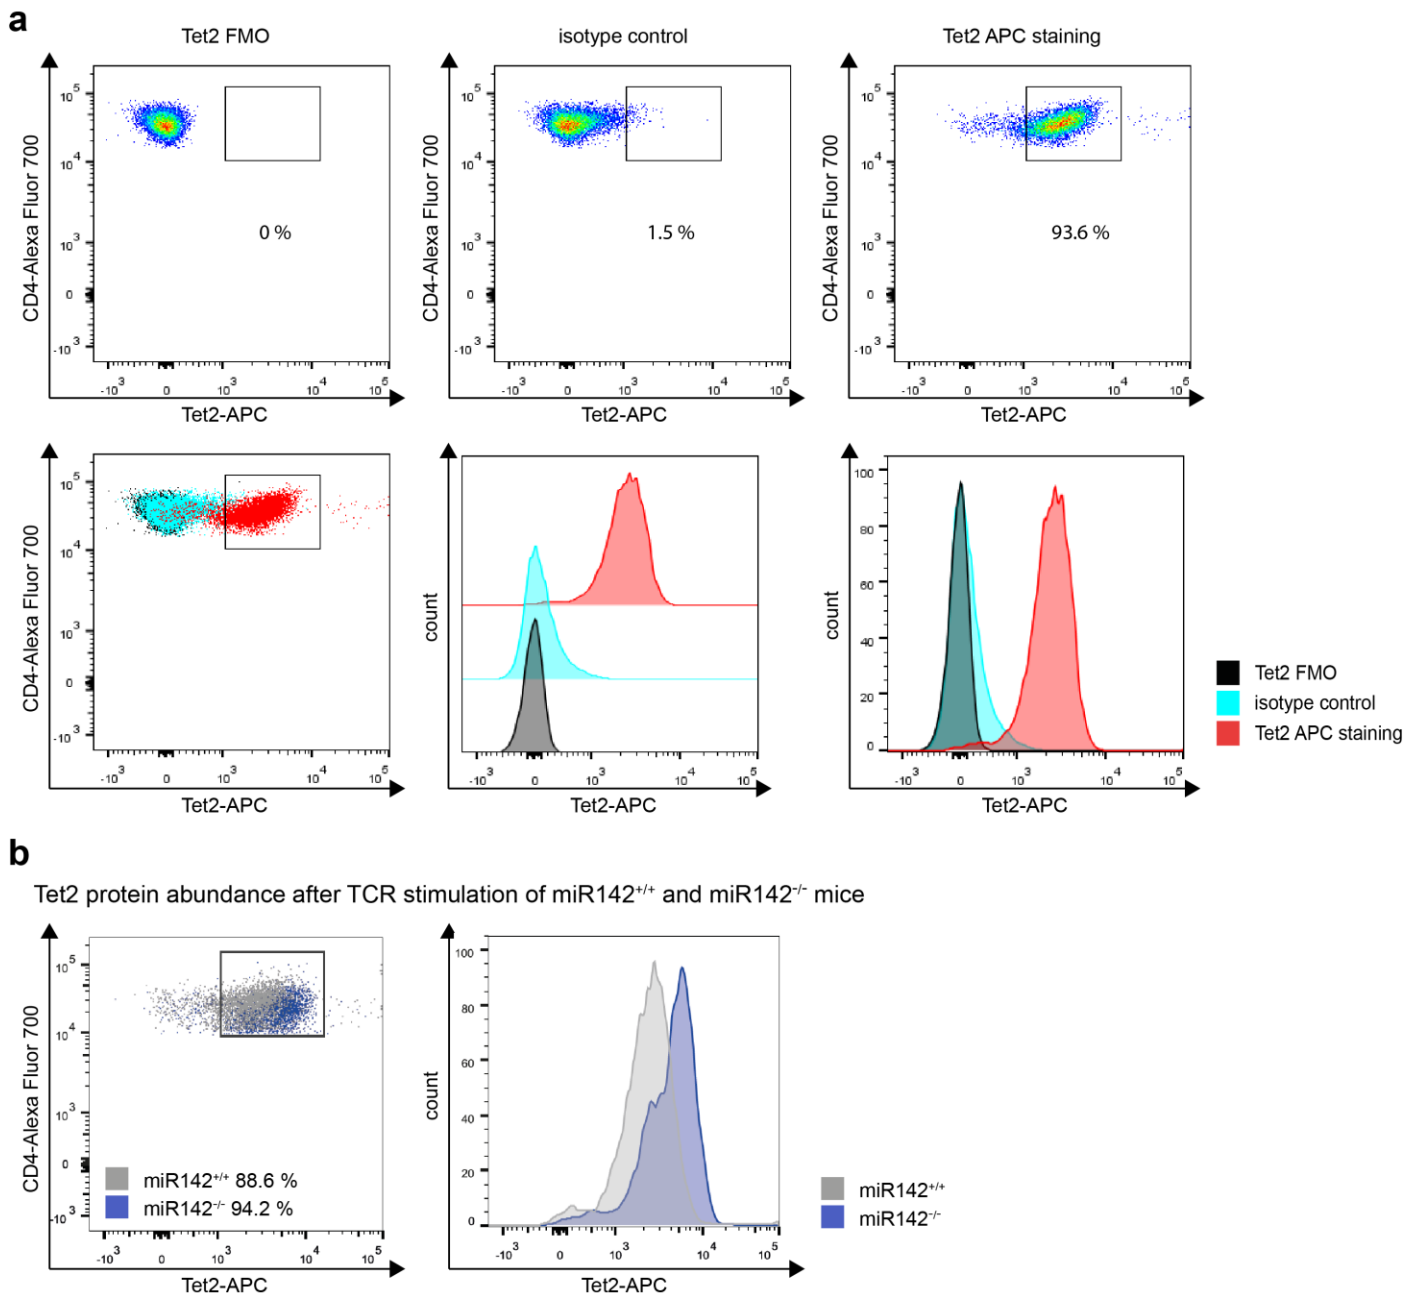

**Supplementary Figure 10. Tet2 flow cytometry staining of murine CD4<sup>+</sup> T cells.** (a) Upper panel: pseudocolor dot plots showing FMO, isotype control and Tet2-APC staining. Lower panel: overlay of FMO, isotype control and Tet2-APC dot plots (left) and histograms showing FMO, isotype control and Tet2-APC staining (middle and right). (b) Dot plots (left) and histograms (right) of a representative Tet2 flow cytometry staining of CD4<sup>+</sup> T cells isolated from lymph nodes of miR142<sup>+/+</sup> and miR142<sup>-/-</sup> mice.

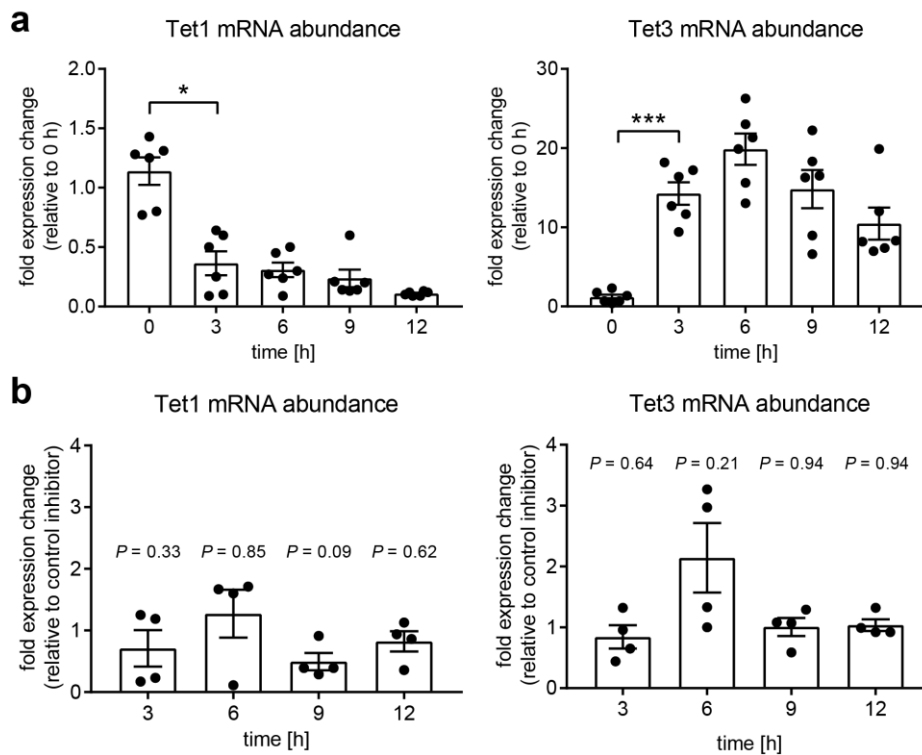

**Supplementary Figure 11. Tet1 and Tet3 expression upon TCR stimulation and miR142-3p inhibition.**

**(a)** Levels of Tet1 and Tet3 mRNA at various time points (0 – 12 hours) of TCR stimulation of CD4<sup>+</sup> T cells isolated from lymph nodes of BALB/c mice as revealed by qPCR normalized to Histone mRNA.  $n = 6$ . **(b)** Levels of Tet1 and Tet3 mRNA after 3, 6, 9 and 12 hours of TCR stimulation of CD4<sup>+</sup> T cells isolated from lymph nodes of BALB/c mice, in presence of a miR142-3p inhibitor and a control inhibitor respectively as revealed by qPCR normalized to Histone mRNA.  $n = 4$ . One data point represents one subject. Experiments were performed in three technical replicates per subject. Data are presented as means  $\pm$  SEM. Ordinary one-way ANOVA, Tukey's multiple comparisons test.  $*P < 0.05$ ,  $***P < 0.001$ . Source data are provided as a Source Data file.

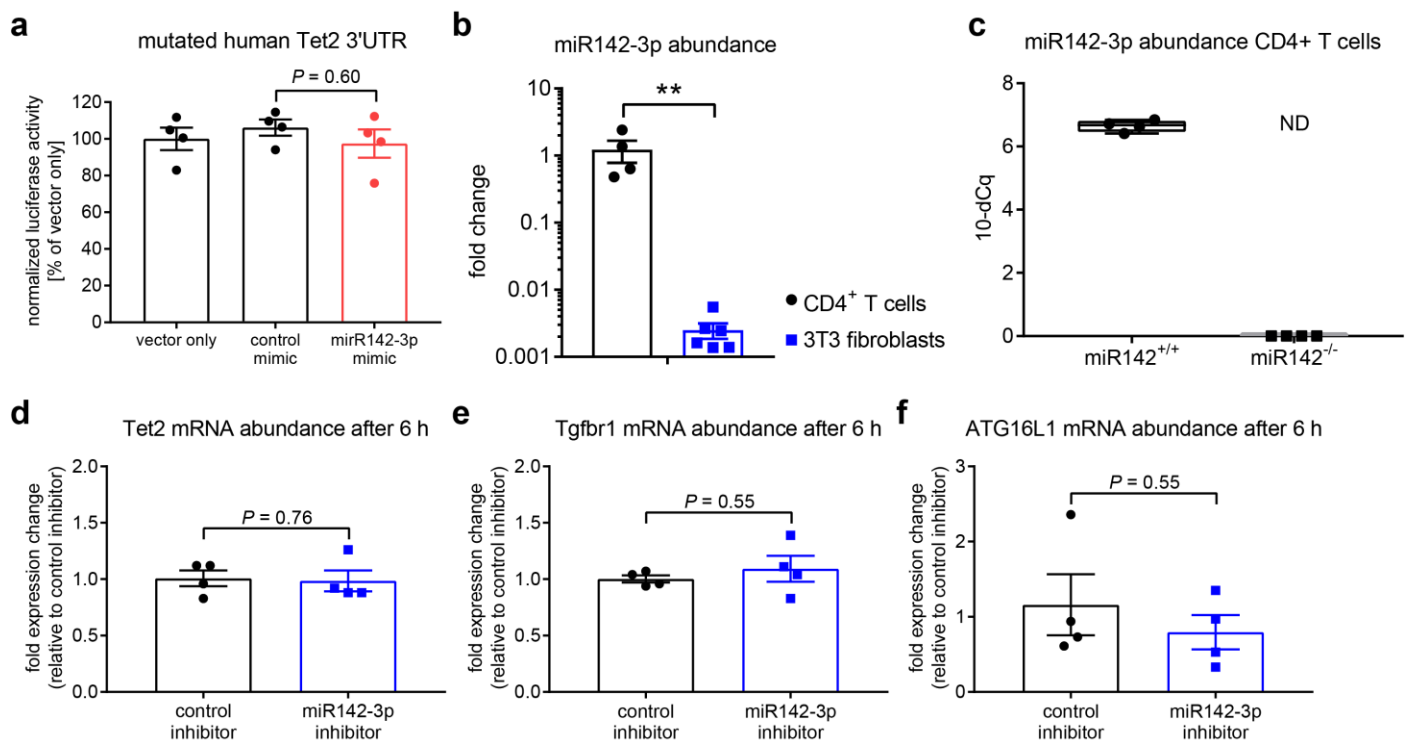

**Supplementary Figure 12. miR142 knockout models and effect of miR142-3p inhibitor in miR142<sup>-/-</sup> CD4<sup>+</sup> T cells *in vitro*.** (a) Normalized luciferase activity of HEK-293 cells co-transfected with a miR142-3p mimic and a TET2 3'UTR reporter construct, with a mutation in the predicted miR142-3p binding sites.  $n = 4$ . (b) Levels of miR142-3p in CD4<sup>+</sup> T cells isolated from lymph nodes of BALB/c mice and 3T3 fibroblasts as revealed by qPCR normalized to 5s rRNA.  $n = 4$ . (c) Levels of miR142-3p in CD4<sup>+</sup> T cells isolated from lymph nodes of miR142 knockout (miR142<sup>-/-</sup>) and control (miR142<sup>+/+</sup>) mice as revealed by qPCR normalized to 5s rRNA.  $n = 4$ . ND = not detectable. (d) Levels of Tet2 mRNA after 6 hours of TCR stimulation of CD4<sup>+</sup> T cells isolated from lymph nodes of miR142<sup>-/-</sup> mice, in presence of a miR142-3p inhibitor and a control inhibitor respectively as revealed by qPCR normalized to Histone mRNA.  $n = 4$ . (e) Levels of Tgfb1 mRNA after 6 hours of TCR stimulation of CD4<sup>+</sup> T cells isolated from lymph nodes of miR142<sup>-/-</sup> mice, in presence of a miR142-3p inhibitor and a control inhibitor respectively as revealed by qPCR normalized to Histone mRNA.  $n = 4$ . (f) Levels of ATG16L1 mRNA after 6 hours of TCR stimulation of CD4<sup>+</sup> T cells isolated from lymph nodes of miR142<sup>-/-</sup> mice, in presence of a miR142-3p inhibitor and a control inhibitor respectively as revealed by qPCR normalized to Histone mRNA.  $n = 4$ . One data point represents one subject. Experiments were performed in three technical replicates per subject. Data are presented as box-and-whisker plots with min and max values or as means  $\pm$  SEM. Student's t-test.  $**P < 0.01$ . Source data are provided as a Source Data file.

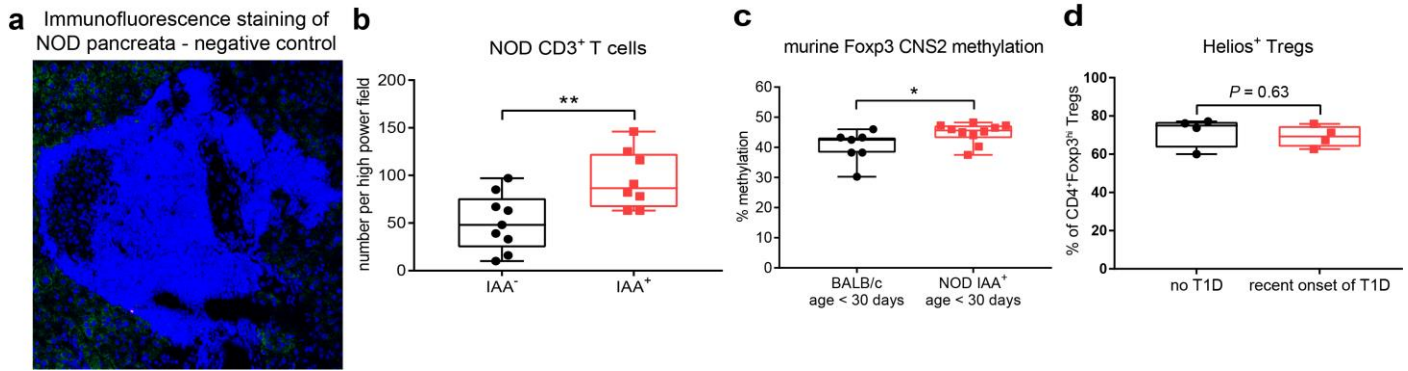

**Supplementary Figure 13. Tet2 abundance and Foxp3 CNS2 methylation are changed upon onset of islet autoimmunity.** (a) Negative control for immunofluorescence staining of pancreas cryosections as shown in Fig. 7b (DAPI = blue). (b) CD3<sup>+</sup> T cells per high power field in pancreas cryosections of NOD mice with and without islet autoimmunity as shown in Fig. 7b.  $n \geq 8$ . (c) Methylation of the Foxp3 CNS2 (mean of all sites) in Tregs isolated from lymph nodes of young female BALB/c mice or IAA<sup>+</sup> NOD mice, age < 30 days as revealed by pyrosequencing.  $n \geq 7$ . (d) Helios<sup>+</sup> Tregs (% of CD4<sup>+</sup>Foxp3<sup>hi</sup> Tregs) isolated from peripheral blood of human subjects with recent onset of T1D and healthy controls as revealed by flow cytometry.  $n = 4$ . One data point represents one subject / one high power field. Experiments were performed in three technical replicates per subject. Data are presented as box-and-whisker plots with min and max values. Student's t-test. \* $P < 0.05$ , \*\* $P < 0.01$ . Source data are provided as a Source Data file.

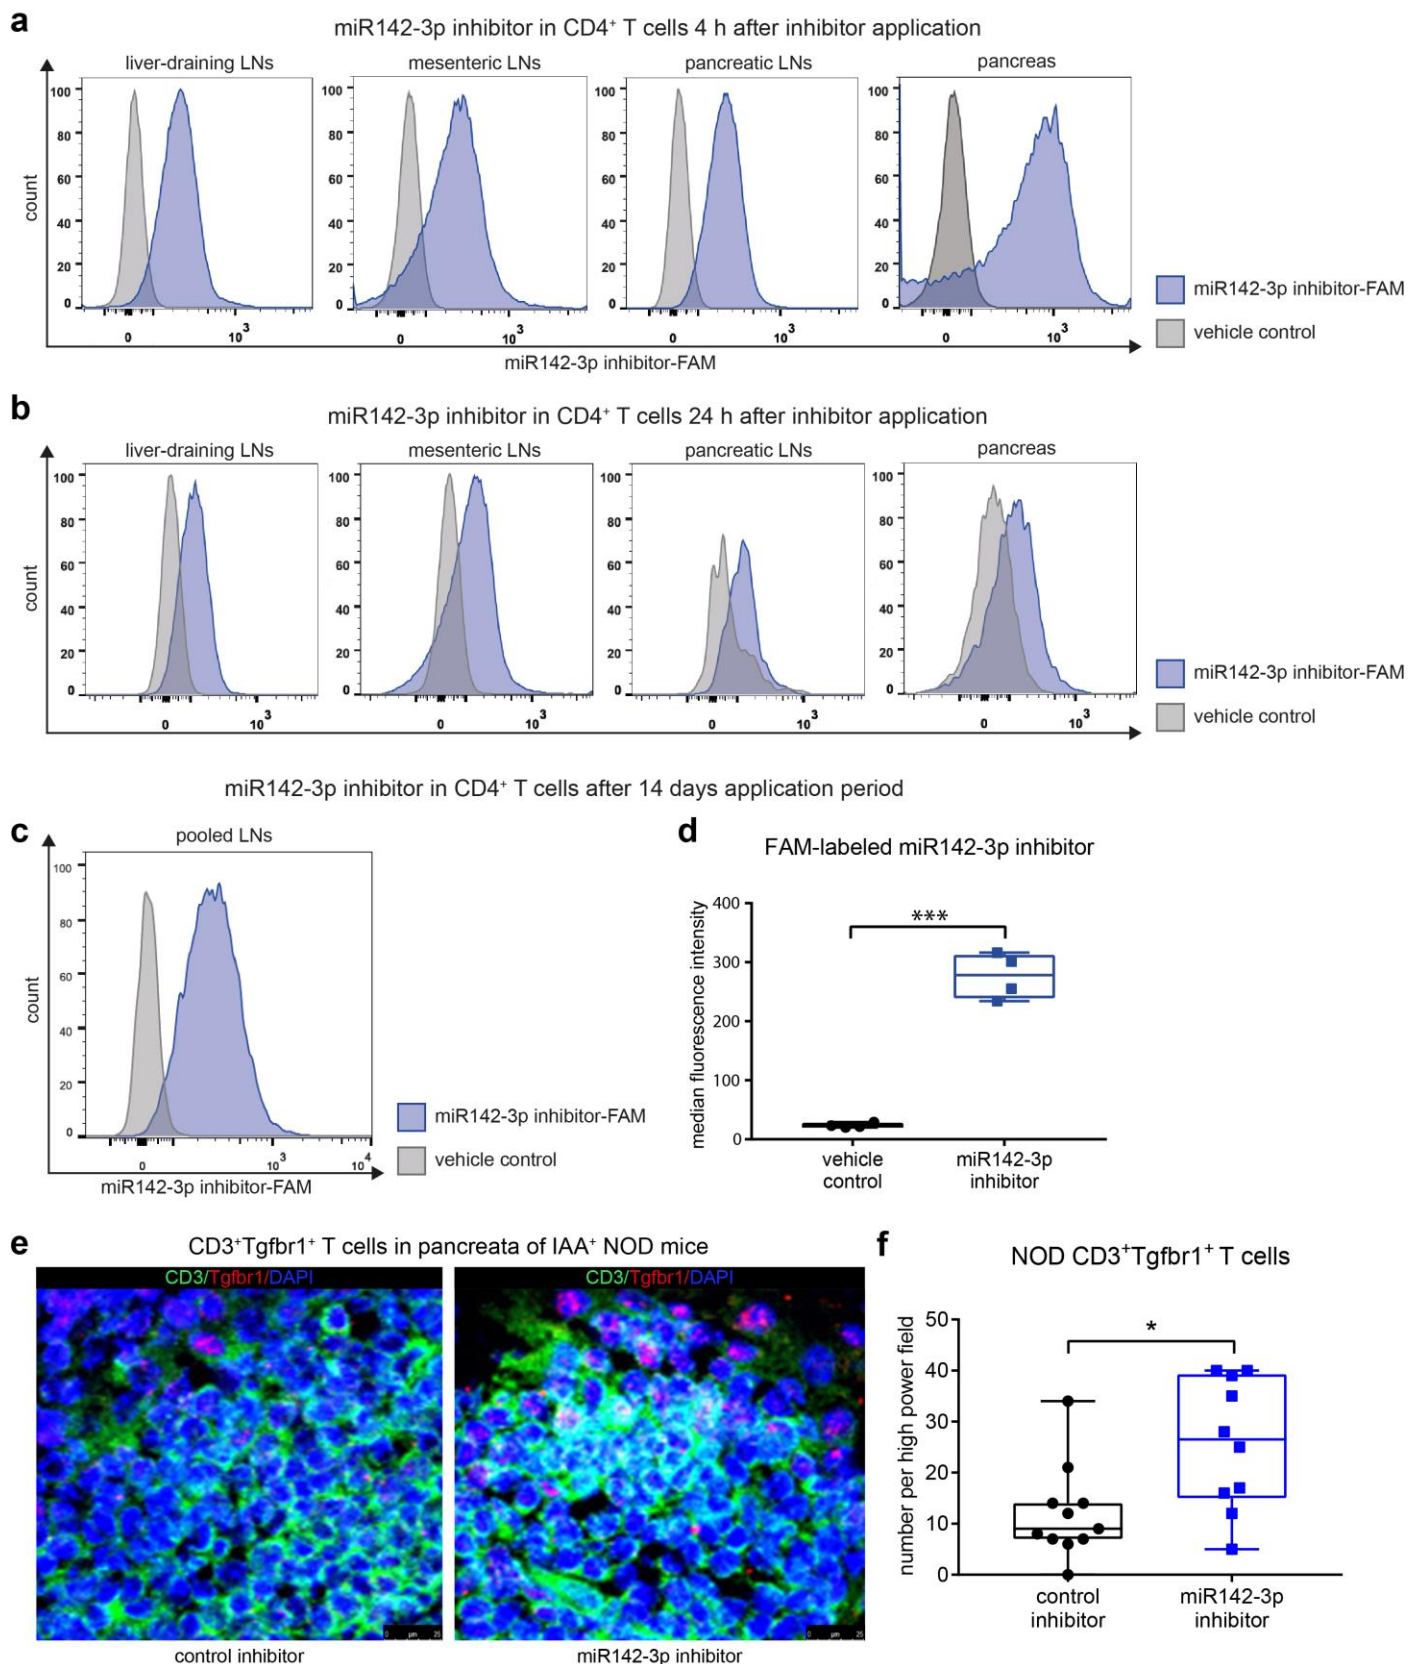

**Supplementary Figure 14. miR142-3p inhibitor accumulates in CD4<sup>+</sup> T cells *in vivo*.** (a) Representative flow cytometry histograms showing the accumulation of the FAM-labelled miR142-3p inhibitor in CD4<sup>+</sup> T cells isolated from relevant lymph nodes and the pancreas 4 hours after inhibitor application. (b) Representative flow cytometry histograms showing the accumulation of the FAM-labelled miR142-3p inhibitor in CD4<sup>+</sup> T cells isolated from relevant lymph nodes and the pancreas 24 hours after inhibitor application. (c) Representative flow cytometry histograms showing the accumulation of the FAM-labelled miR142-3p inhibitor in CD4<sup>+</sup> T cells isolated from lymph nodes of mice treated with a miR142-3p inhibitor

or control inhibitor for 14 days with 10 mg/kg ip every other day. **(d)** miR142-3p inhibitor abundance (median fluorescence intensity) in CD4<sup>+</sup> T cells isolated from lymph nodes of mice treated as described in (c) and revealed by flow cytometry.  $n = 4$ . **(e)** Immunofluorescent staining for CD3 (green), Tgfbr1 (red) and DAPI (blue) in pancreas cryosections of IAA<sup>+</sup> NOD mice after treatment with a miR142-3p inhibitor or control inhibitor as described in (c). Scale bar: 25  $\mu$ m **(f)** Quantification of CD3<sup>+</sup>Tgfbr1<sup>+</sup> T cells per high power field in samples from (e).  $n \geq 10$ . One data point represents one mouse (d), one high power field (f). Data are presented as box-and-whisker plots with min and max values. Student's t-test. \* $P < 0.05$ , \*\*\* $P < 0.001$ . Source data are provided as a Source Data file.



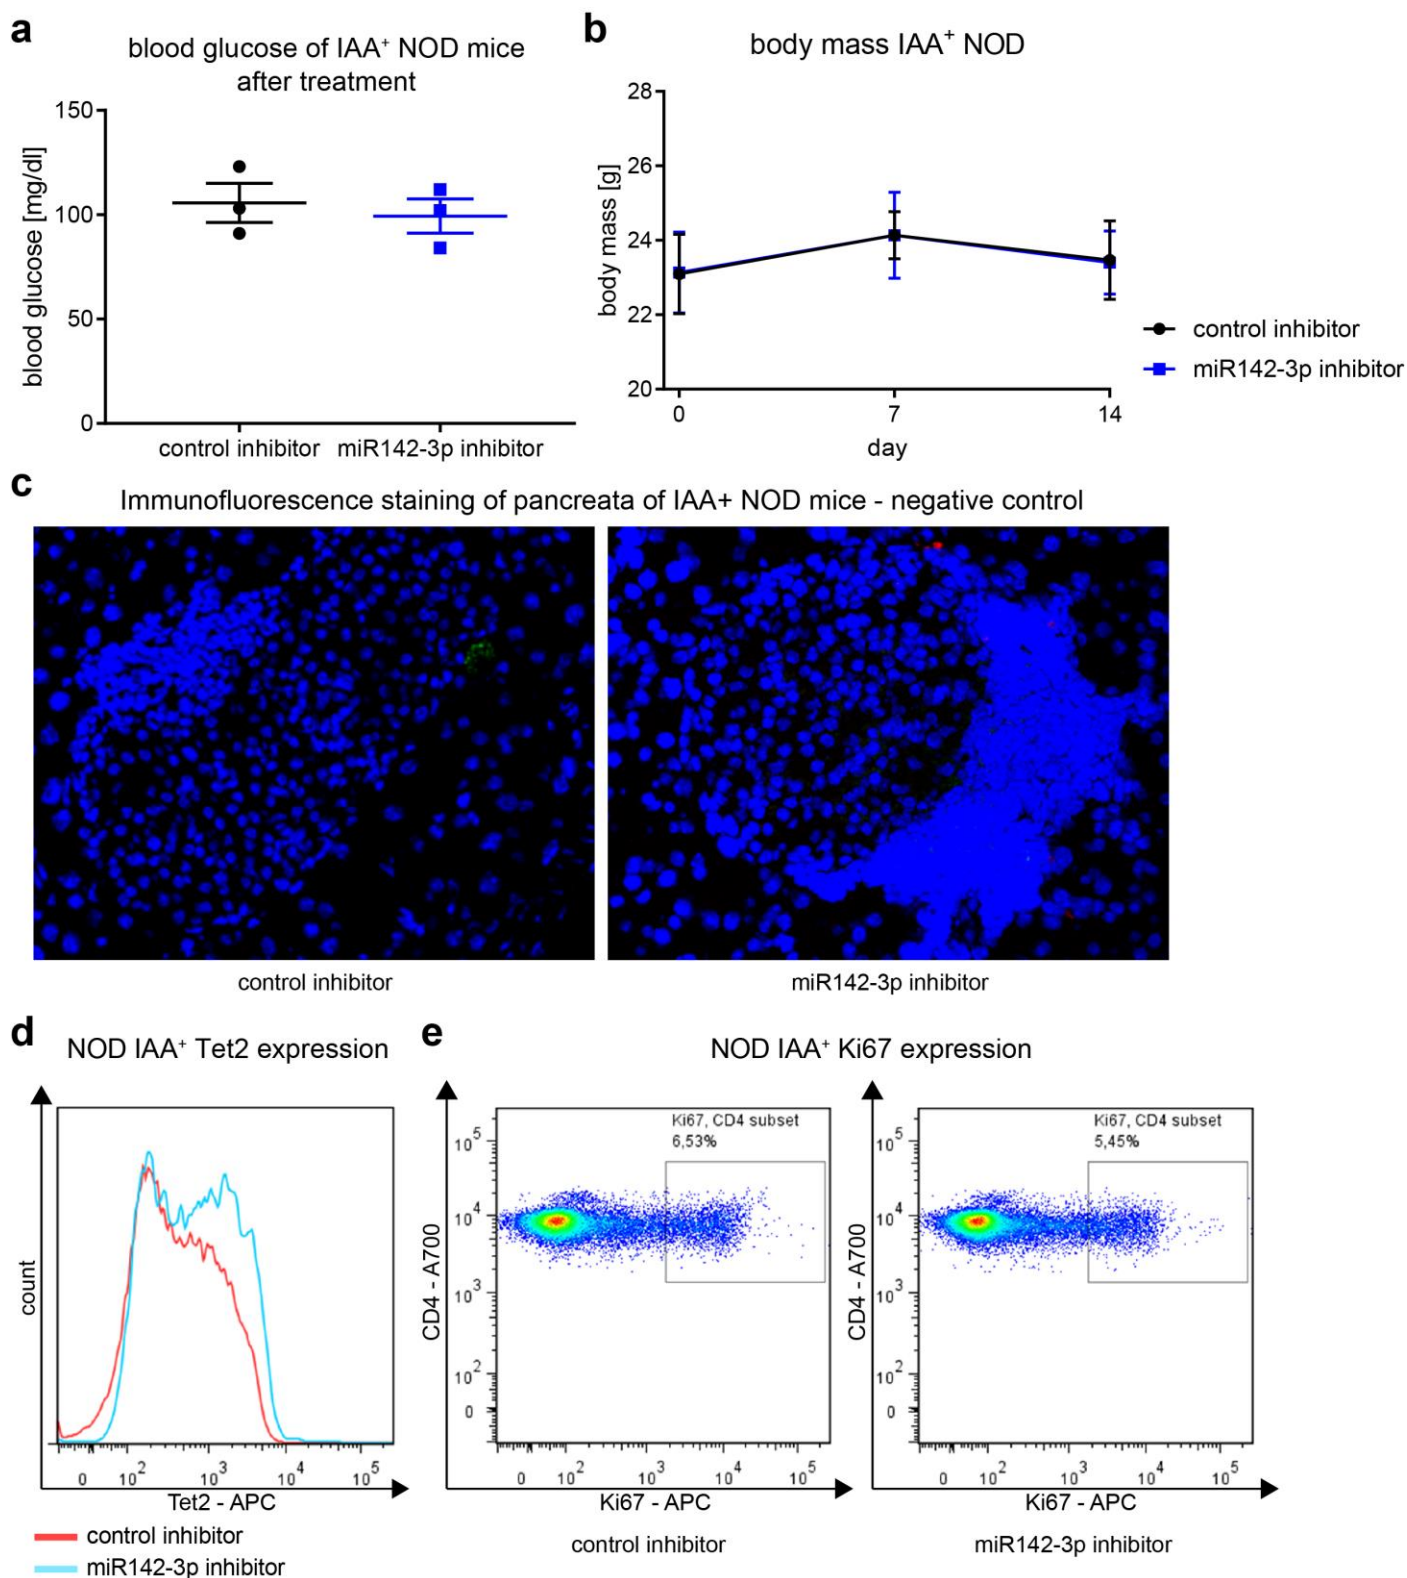

**Supplementary Figure 15. Effects of miR142-3p inhibition *in vivo*.** (a) Blood glucose levels in IAA<sup>+</sup> NOD mice treated with a miR142-3p inhibitor or control inhibitor for 14 days with 10 mg/kg ip every other day.  $n = 3$ . (b) Body mass development in IAA<sup>+</sup> NOD mice treated as described in (a).  $n = 3$ . (c) Negative control for immunofluorescence staining of pancreas cryosections of IAA<sup>+</sup> NOD mice treated as described in (a) and as shown in Fig. 8d (DAPI = blue). (d) Representative flow cytometry histogram of Tet2 staining in CD4<sup>+</sup> T cells isolated from peripheral blood of IAA<sup>+</sup> NOD mice treated as described in (a). (e) Representative flow cytometry plots indicating CD4<sup>+</sup>Ki67<sup>+</sup> T cells in peripheral blood of IAA<sup>+</sup> NOD mice treated as described in (a). One data point represents one mouse (a), mean of three mice (b). Data are

presented as means  $\pm$  SEM. (b) Ordinary one-way ANOVA, Tukey's multiple comparisons test. (a) Student's t-test.  $*P < 0.05$ . Source data are provided as a Source Data file.

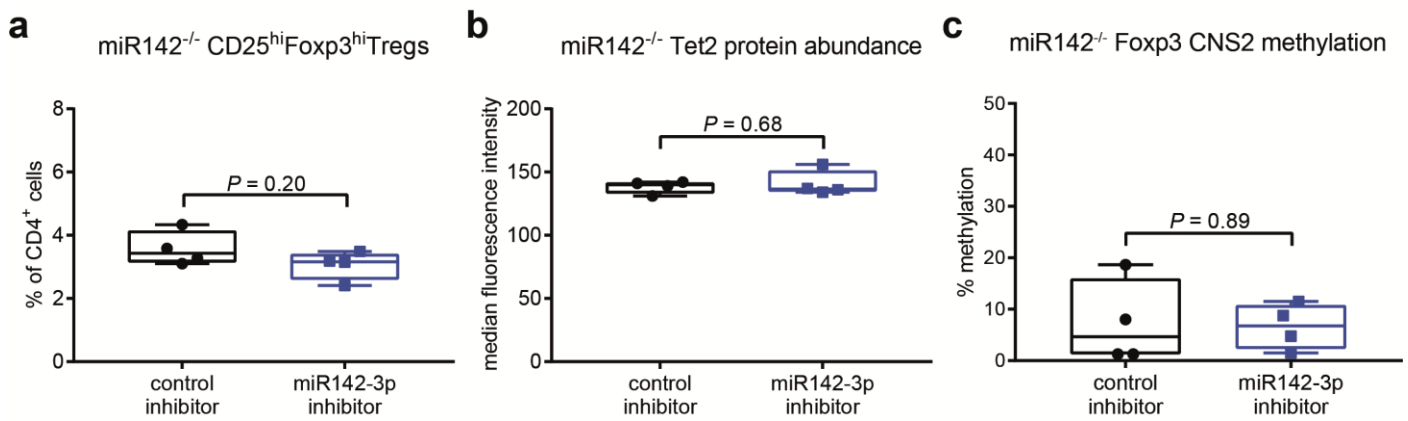

**Supplementary Figure 16. miR142-3p inhibitor has no effect in miR142<sup>-/-</sup> mice *in vivo*.** (a) *Ex vivo* CD25<sup>hi</sup>Fxp3<sup>+</sup> Tregs isolated from lymph nodes of miR142<sup>-/-</sup> mice treated with a miR142-3p inhibitor or control inhibitor for 14 days with 10 mg/kg ip every other day as revealed by flow cytometry. *n* = 4. (b) *Ex vivo* Tet2 protein abundance (median fluorescence intensity) in CD4<sup>+</sup> T cells isolated from lymph nodes of miR142<sup>-/-</sup> mice treated with a miR142-3p inhibitor or control inhibitor as described in (a) and revealed by flow cytometry. *n* = 4. (c) Methylation of the Fxp3 CNS2 (mean of all sites) in Tregs isolated from lymph nodes of miR142<sup>-/-</sup> mice treated with a miR142-3p inhibitor or control inhibitor as described in (a) and revealed by pyrosequencing. *n* = 4. One data point represents one mouse. Data are presented as box-and-whisker plots with min and max values. Student's t-test. Source data are provided as a Source Data file.

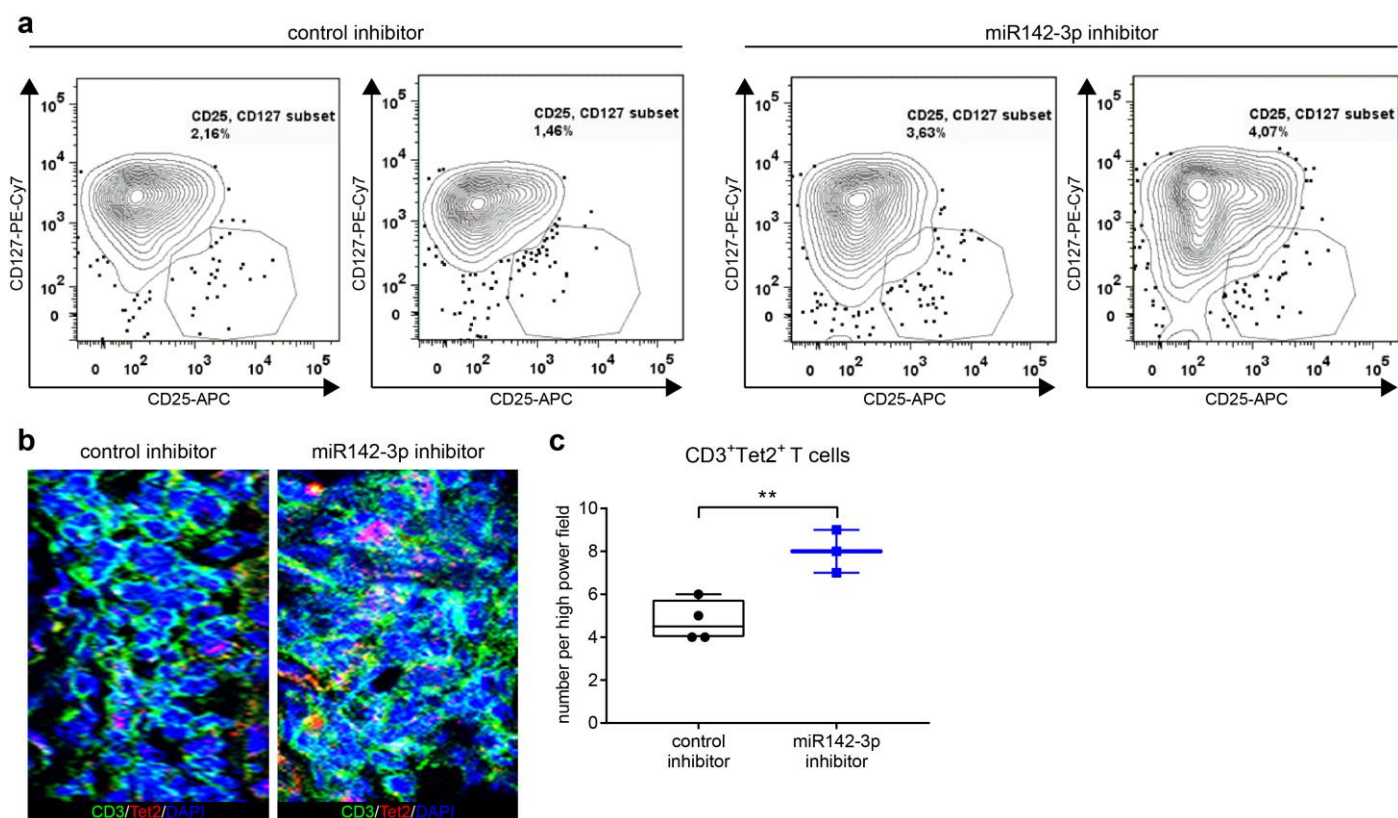

**Supplementary Figure 17. Effects of miR142-3p inhibition in humanized NSG mice. (a)** Representative set of flow cytometry plots indicating CD25<sup>hi</sup>CD127<sup>lo</sup> Tregs in lymph nodes and spleen of humanized NSG mice treated with a miR142-3p inhibitor or control inhibitor for 14 days with 10 mg/kg ip every other day. **(b)** Immunofluorescent staining for CD3 (green), Tet2 (red) and DAPI (blue) in pancreas cryosections of humanized NSG mice treated with a miR142-3p inhibitor or control inhibitor as described in (a). **(c)** Quantification of CD3<sup>+</sup>Tet2<sup>+</sup> T cells per high power field in samples from (b).  $n \geq 3$ . One data point represents one high power field. Data are presented as box-and-whisker plots with min and max values Student's t-test.  $**P < 0.01$ . Source data are provided as a Source Data file.

## Supplementary Table 1: Oligonucleotide sequences

### Primer sequences qPCR

| gene         | forward                 | reverse                 | source                          |
|--------------|-------------------------|-------------------------|---------------------------------|
| Histone      | ACTGGCTACAAAAGCCG       | ACTTGCCTCCTGCAAAGCAC    | Sigma Aldrich                   |
| Tet2 hs      | TTCGCAGAAGCAGCAGTGAAGAG | AGCCAGAGACAGCGGGATTCTT  | Sigma Aldrich                   |
| Tet1 mm      | ATGAGCGGCACCCTGAAGCG    | GCACCGAGCCGTGAATGGGT    | Sigma Aldrich                   |
| Tet2 mm      | CCTTGCATTGGAGGGGTGGCT   | GTGGGGTGATTCCGGTCGGG    | Sigma Aldrich                   |
| Tet3 mm      | CACGGCTTCGAGGCAAGCCA    | CCCCGGTTCCCATCCCCCAT    | Sigma Aldrich                   |
| Tgfbr1       | GCAGCTCCTCATCGTGTGG     | GCAGAAACACTGTAATGCCTTCG | Sigma Aldrich                   |
| ATG16L1      | CCGAATCTCCCCTTTTGGGA    | CATGCGCATCGAAGACATACG   | Sigma Aldrich                   |
| 5s           | N/A                     | N/A                     | Exiqon (miRCURY LNA primer set) |
| miR142-3p hs | N/A                     | N/A                     | Exiqon (miRCURY LNA primer set) |
| miR142-3p mm | N/A                     | N/A                     | Exiqon (miRCURY LNA primer set) |

### Primer sequences methylation analysis

| site          | forward                                       | reverse                           | pyrosequencing               | source        |
|---------------|-----------------------------------------------|-----------------------------------|------------------------------|---------------|
| Foxp3 CNS2 hs | AAGTTGAATGGGGGATG<br>TTTTTGGGATATAGATTA<br>TG | CTACCACATCCACCAAC<br>ACCCATATCACC | TAGTTTTAGATTTGTTTA<br>GATTTT | Sigma Aldrich |
| Foxp3 CNS2 mm | TTGGGTTTTGTTGTTATA<br>ATTTGAATTTGG            | ACCTACCTAATACTCACC<br>AAACATC     | AATTTGAATTTGGTTAGA<br>TTTTT  | Sigma Aldrich |

### Primer sequences for site directed mutagenesis of TET2 3'UTR

| site      | forward (mutation in bold type)       | reverse (mutation in bold type)        | source        |
|-----------|---------------------------------------|----------------------------------------|---------------|
| mut_site1 | GTCATATACCTCAAACATAGTTTGGCAAT<br>AGG  | CCTATTGCCAAACTATGTTTGAGGTATATGA<br>C   | Sigma Aldrich |
| mut_site2 | CTTTTGCAGTTTGAACATAAGATAACTTC<br>TGTG | CACAGAAGTTATCTTATGTTCAAACCTGCAA<br>AAG | Sigma Aldrich |

#### Sequences miRNA inhibitors and mimics

| inhibitor/mimic           | sequence                | source                                 |
|---------------------------|-------------------------|----------------------------------------|
| miR142-3p inhibitor hs/mm | CCATAAAGTAGGAAACACT     | Exiqon miRCURY LNA™ microRNA inhibitor |
| miR142-3p mimic hs/mm     | TGTAGTGTTTCCTACTTTATGGA | Exiqon miRCURY LNA™ microRNA mimic     |
| control inhibitor hs/mm   | TAACACGTCTATACGCCCA     | Exiqon miRCURY LNA™ microRNA inhibitor |
| control mimic hs/mm       | GATGGCATTTCGATCAGTTCTA  | Exiqon miRCURY LNA™ microRNA mimic     |

#### Sequences siRNAs

| siRNA            | sequence | source                                         |
|------------------|----------|------------------------------------------------|
| Tet2 mm          | N/A      | Ambion (Silencer Select Pre-Designed siRNA)    |
| Tet2 hs          | N/A      | Ambion (Silencer Select Pre-Designed siRNA)    |
| Negative control | N/A      | Ambion (Silencer Select Negative control no.1) |
